# Supplementary material
Source: PubMed Central journal article supplement (PMC4269771)
Supplement: mmc1.pdf [file mmc1.pdf]

# The Kinetic Stability of Cytochrome *c* Oxidase: Effect of Bound Phospholipids and Dimerization

Erik Sedlák, Rastislav Varhač, Andrej Musatov, and Neal C. Robinson

**Table S1.** Calculated parameters based on two-step analysis of the data shown in Figure 1 the irreversible thermal transitions of PL-containing and PL-free CcO's at 5 $\mu$ M.

| <i>CcO form</i>                    | $E_{a1}$<br>(kJ/mol) | $T_1^*/T_1$<br>(°C)    | $\Delta H_{u1}$<br>(kJ/mol) | $\tau_{37\text{ degC}}$<br>(hours) | $E_{a2}$<br>(kJ/mol) | $T_2^*/T_2$<br>(°C)    | $\Delta H_{u2}$<br>(kJ/mol) | $R^2$  |
|------------------------------------|----------------------|------------------------|-----------------------------|------------------------------------|----------------------|------------------------|-----------------------------|--------|
| <b>PL-containing<br/>1.5 K/min</b> | 344<br>$\pm 10$      | 53.0/51.6<br>$\pm 0.1$ | 504<br>$\pm 11$             | 8.0                                | 413<br>$\pm 5$       | 63.2/61.6<br>$\pm 0.1$ | 1157<br>$\pm 12$            | 0.9917 |
| <b>PL-free CcO<br/>1.5 K/min</b>   | 283<br>$\pm 14$      | 47.1/45.2<br>$\pm 0.3$ | 198<br>$\pm 8$              | 0.4                                | 268<br>$\pm 3$       | 61.8/58.4<br>$\pm 0.1$ | 1097<br>$\pm 10$            | 0.9934 |

$T^*$  values are the temperatures at which the rate constant for the specific reaction is 1/min.  $T$  values are the temperatures corresponding to maximal value of molar heat capacity,  $\Delta c_p$ , in Figure 1.

Subscript 1 corresponds to the first N-to-I transition, and subscript 2 corresponds to the subsequent I-to-D process.

**Table S2.** Parameters obtained from DSC transitions of CcO at indicated concentration of CcO at scan rate 1.5 K/min. The listed parameters (transition temperatures,  $T_x$ , are temperatures corresponding to maximal value of molar heat capacity and values of calorimetric enthalpies,  $\Delta H_{ux}$ , correspond to surface under the corresponding DSC transitions) are experimentally determined values from DSC scans and are model-independent.

| $[CcO]$<br>( $\mu$ M) | $T_1$<br>(°C)  | $\Delta H_{u1}$<br>(kJ/mol) | $T_2$<br>(°C)  | $\Delta H_{u2}$<br>(kJ/mol) | $R^2$  |
|-----------------------|----------------|-----------------------------|----------------|-----------------------------|--------|
| 0.55                  | 46.2 $\pm$ 0.1 | 510 $\pm$ 11                | 59.5 $\pm$ 0.1 | 1236 $\pm$ 12               | 0.9922 |
| 1.1                   | 47.5 $\pm$ 0.1 | 456 $\pm$ 14                | 60.0 $\pm$ 0.1 | 1270 $\pm$ 14               | 0.9897 |
| 1.6                   | 48.4 $\pm$ 0.1 | 500 $\pm$ 14                | 60.8 $\pm$ 0.1 | 1169 $\pm$ 15               | 0.9904 |
| 2.1                   | 48.7 $\pm$ 0.1 | 525 $\pm$ 10                | 61.1 $\pm$ 0.1 | 1271 $\pm$ 9                | 0.9953 |
| 3.2                   | 50.3 $\pm$ 0.1 | 454 $\pm$ 6                 | 61.5 $\pm$ 0.1 | 1161 $\pm$ 6                | 0.9981 |
| 3.6                   | 50.6 $\pm$ 0.1 | 463 $\pm$ 17                | 61.4 $\pm$ 0.1 | 1148 $\pm$ 20               | 0.9789 |
| 4.1                   | 51.6 $\pm$ 0.1 | 461 $\pm$ 16                | 61.2 $\pm$ 0.1 | 1235 $\pm$ 19               | 0.9850 |
| 5.0                   | 51.6 $\pm$ 0.1 | 504 $\pm$ 11                | 61.6 $\pm$ 0.1 | 1157 $\pm$ 12               | 0.9917 |
| 5.2                   | 51.0 $\pm$ 0.1 | 481 $\pm$ 15                | 61.8 $\pm$ 0.1 | 1320 $\pm$ 18               | 0.9914 |

Subscript 1 corresponds to the first N-to-I transition, and subscript 2 corresponds to the subsequent I-to-D process.

**Table S3.** Calculated parameters based on two-step analysis of the data shown in Figure 7 the irreversible thermal transitions of PL-containing CcO's (5  $\mu$ M) in the presence and the absence of 2mM sodium cholate in different concentrations of dodecyl maltoside (DM).

| [DM] $\pm$ cholate | $E_{a1}$<br>(kJ/mol) | $T_1^*/T_1$<br>( $^{\circ}$ C) | $\Delta H_{u1}$<br>(kJ/mol) | $\tau_{37 \text{ degC}}$<br>(hours) | $E_{a2}$<br>(kJ/mol) | $T_2^*/T_2$<br>( $^{\circ}$ C) | $\Delta H_{u2}$<br>(kJ/mol) | $R^2$  |
|--------------------|----------------------|--------------------------------|-----------------------------|-------------------------------------|----------------------|--------------------------------|-----------------------------|--------|
| 2mM -cholate       | 354<br>$\pm 13$      | 53.0/51.6<br>$\pm 0.2$         | 504<br>$\pm 13$             | 7.3                                 | 413<br>$\pm 6$       | 63.2/61.6<br>$\pm 0.1$         | 1157<br>$\pm 15$            | 0.9907 |
| 6mM -cholate       | 359<br>$\pm 7$       | 50.9/49.8<br>$\pm 0.1$         | 448<br>$\pm 7$              | 4.5                                 | 384<br>$\pm 3$       | 62.5/61.0<br>$\pm 0.1$         | 1245<br>$\pm 8$             | 0.9965 |
| 10mM-cholate       | 346<br>$\pm 7$       | 50.5/48.8<br>$\pm 0.1$         | 459<br>$\pm 7$              | 3.2                                 | 419<br>$\pm 4$       | 62.0/60.8<br>$\pm 0.1$         | 1187<br>$\pm 8$             | 0.9964 |
| 14mM-cholate       | 347<br>$\pm 8$       | 49.6/48.0<br>$\pm 0.1$         | 465<br>$\pm 8$              | 1.5                                 | 409<br>$\pm 4$       | 61.9/60.8<br>$\pm 0.1$         | 1195<br>$\pm 9$             | 0.9954 |
| 2mM +cholate       | 526<br>$\pm 24$      | 54.1/54.3<br>$\pm 0.1$         | 280<br>$\pm 11$             | 475.0                               | 320<br>$\pm 9$       | 63.8/61.1<br>$\pm 0.1$         | 1079<br>$\pm 15$            | 0.9820 |
| 6mM +cholate       | 406<br>$\pm 22$      | 52.6/52.1<br>$\pm 0.2$         | 415<br>$\pm 17$             | 22.0                                | 381<br>$\pm 8$       | 62.8/60.9<br>$\pm 0.1$         | 1280<br>$\pm 22$            | 0.9815 |
| 10mM+cholate       | 375<br>$\pm 14$      | 51.7/50.7<br>$\pm 0.1$         | 408<br>$\pm 12$             | 8.2                                 | 419<br>$\pm 6$       | 61.4/60.0<br>$\pm 0.1$         | 1112<br>$\pm 13$            | 0.9898 |
| 14mM+cholate       | 361<br>$\pm 8$       | 51.5/50.2<br>$\pm 0.1$         | 419<br>$\pm 7$              | 6.1                                 | 423<br>$\pm 4$       | 61.5/60.3<br>$\pm 0.1$         | 1122<br>$\pm 8$             | 0.9966 |

$T^*$  values are the temperatures at which the rate constant for the specific reaction is 1/min.  $T$  values are the temperatures corresponding to maximal value of molar heat capacity,  $\Delta c_p$ , in Figure 7.

Subscript 1 corresponds to the first N-to-I transition, and subscript 2 corresponds to the subsequent I-to-D process.
